# Supplementary material for: Harnessing Activin A Adjuvanticity to Promote Antibody Responses to BG505 HIV Envelope Trimers
Source: PubMed Central journal article supplement (PMC7308430; doi:10.3389/fimmu.2020.01213), 2020-06-16
Supplement: Data_Sheet_2.pdf [file Data_Sheet_2.pdf]

**Supplementary Table 1**

| <b>Animal</b> | <b>Sex</b> | <b>Weight (kg)<br/>start of study</b> | <b>Age<br/>start of study</b> | <b>Previous<br/>treatment</b> | <b>Immunization</b>        | <b>On study<br/>treatment</b> |
|---------------|------------|---------------------------------------|-------------------------------|-------------------------------|----------------------------|-------------------------------|
| RYf16         | Male       | 5.2                                   | 2 yr 10 mo                    | None                          | Env trimer +<br>ISCOMATRIX | Activin A                     |
| RWf16         | Male       | 4.9                                   | 2 yr 10 mo                    | None                          | Env trimer +<br>ISCOMATRIX | Activin A                     |
| RVa16         | Male       | 4.7                                   | 3 yrs                         | None                          | Env trimer +<br>ISCOMATRIX | Activin A                     |
| RFo15         | Male       | 6.09                                  | 3 yr 11 mo                    | None                          | Env trimer +<br>ISCOMATRIX | Activin A                     |
| RBd15         | Male       | 6.31                                  | 4 yr 1 mo                     | None                          | Env trimer +<br>ISCOMATRIX | Activin A                     |
| RWr15         | Male       | 6.26                                  | 4 yr 1 mo                     | None                          | Env trimer +<br>ISCOMATRIX | Activin A                     |
| RWi15         | Male       | 8.1                                   | 4 yr                          | None                          | Env trimer +<br>ISCOMATRIX | None                          |
| RHf15         | Male       | 8.15                                  | 4 yr                          | None                          | Env trimer +<br>ISCOMATRIX | None                          |
| RRe16         | Male       | 4.4                                   | 2 yr 11 mo                    | None                          | Env trimer +<br>ISCOMATRIX | None                          |
| RUe16         | Male       | 5.52                                  | 2 yr 11 mo                    | None                          | Env trimer +<br>ISCOMATRIX | None                          |
| RQc16         | Male       | 5.36                                  | 3 yr                          | None                          | Env trimer +<br>ISCOMATRIX | None                          |
| REu15         | Male       | 4.9                                   | 2 yr 10 mo                    | None                          | Env trimer +<br>ISCOMATRIX | None                          |
